# Effects of Recombinant Human Interleukin 7 on T-Cell Recovery and Thymic Output in HIV-Infected Patients Receiving Antiretroviral Therapy: Results of a Phase I/IIa Randomized, Placebo-Controlled, Multicenter Study

Y. Lévy,<sup>1,2,3,a</sup> I. Sereti,<sup>4,a</sup> G. Tambussi,<sup>5</sup> J. P. Routy,<sup>6</sup> J. D. Lelièvre,<sup>1,3</sup> J. F. Delfraissy,<sup>4</sup> J. M. Molina,<sup>8</sup> M. Fischl,<sup>9</sup> C. Goujard,<sup>7</sup> B. Rodriguez,<sup>14</sup> C. Rouzioux,<sup>10</sup> V. Avettand-Fenoël,<sup>10</sup> T. Croughs,<sup>11</sup> S. Beq,<sup>11</sup> M. Morre,<sup>11</sup> J. F. Poulin,<sup>12</sup> R. P. Sekaly,<sup>12</sup> R. Thiebaut,<sup>13</sup> and M. M. Lederman<sup>14</sup>

<sup>1</sup>Inserm, U955, <sup>2</sup>Université Paris Est, Faculté de Médecine, and <sup>3</sup>AP-HP, Hôpital H. Mondor–A. Chenevier, Service Hospitalier, Créteil, France; <sup>4</sup>National Institute of Allergy and Infectious Diseases, National Institutes of Health, Bethesda, Maryland; <sup>5</sup>San Raffaele Scientific Institute, Milan, Italy; <sup>6</sup>McGill University Health Center, Montreal, Canada; <sup>7</sup>Hosp Kremlin Bicêtre, <sup>8</sup>Hosp St-Louis, Paris, France; <sup>9</sup>University of Miami School of Medicine, Florida; <sup>10</sup>AP-HP Hôpital Necker, Université Paris Descartes, <sup>11</sup>Cytheris SA, Issy-les-Moulineaux, France; <sup>12</sup>NIML, Montreal, Canada; <sup>13</sup>INSERM U897, Bordeaux, France; and <sup>14</sup>Case Western Reserve University/University Hospitals/Case Medical Center, Cleveland, Ohio

**Background.** The immune deficiency of human immunodeficiency virus (HIV) infection is not fully corrected with ARV therapy. Interleukin-7 (IL-7) can boost CD4 T-cell counts, but optimal dosing and mechanisms of cellular increases need to be defined.

**Methods.** We performed a randomized placebo-controlled dose escalation (10, 20 and 30 µg/kg) trial of 3 weekly doses of recombinant human IL-7 (rhIL-7) in ARV-treated HIV-infected persons with CD4 T-cell counts between 101 and 400 cells/µL and plasma HIV levels <50 copies/mL. Toxicity, activity and the impact of rhIL-7 on immune reconstitution were monitored.

**Results.** Doses of rhIL-7 up to 20 µg/kg were well tolerated. CD4 increases of predominantly naive and central memory T cells were brisk (averaging 323 cells/µL at 12 weeks) and durable (up to 1 year). Increased cell cycling and transient increased bcl-2 expression were noted. Expanded cells did not have the characteristics of regulatory or activated T cells. Transient low-level HIV viremia was seen in 6 of 26 treated patients; modest increases in total levels of intracellular HIV DNA were proportional to CD4 T-cell expansions. IL-7 seemed to increase thymic output and tended to improve the T-cell receptor (TCR) repertoire in persons with low TCR diversity.

**Conclusions.** Three weekly doses of rhIL-7 at 20 µg/kg are well tolerated and lead to a dose-dependent CD4 T-cell increase and the broadening of TCR diversity in some subjects. These data suggest that this rhIL-7 dose could be advanced in future rhIL-7 clinical studies.

**Clinical Trials Registration.** NCT0047732.

Received 14 October 2011; accepted 5 March 2012; electronically published 1 May 2012.

<sup>a</sup>Y. L. and I. S. contributed equally to this work.

Correspondence: Yves Lévy, MD, PhD, Service d'Immunologie Clinique, Hôpital Henri Mondor, 51 Av du Maréchal de Lattre de Tassigny, 94019 Créteil, France (yves.levy@hmn.aphp.fr).

**Clinical Infectious Diseases** 2012;55(2):291–300

© The Author 2012. Published by Oxford University Press on behalf of the Infectious Diseases Society of America. All rights reserved. For Permissions, please email: journals.permissions@oup.com. This is an Open Access article distributed under the terms of the Creative Commons Attribution Non-Commercial License (<http://creativecommons.org/licenses/by-nc/3.0/>), which permits unrestricted non-commercial use, distribution, and reproduction in any medium, provided the original work is properly cited.

DOI: 10.1093/cid/cis383

Interleukin 7 (IL-7), a cytokine produced by lymph node and thymus stromal cells, has profound effects on human and murine T-cell homeostasis [1]. IL-7 is required for thymic T-cell development in the thymus and also promotes postthymic T-cell survival, proliferation and maturation (reviewed in [2]).

The heterodimeric IL-7 receptor (IL-7R) comprises a cytokine binding IL-7R $\alpha$  chain and a signaling common  $\gamma$  chain ( $\gamma$ c) shared by other cytokine receptors [3]. The IL-7R is expressed by lymphocyte precursors, developing thymocytes, and mature T cells. Patients with mutations

in IL-7R $\alpha$  experience severe combined immunodeficiency [3, 4] confirming that IL-7 is essential for human T-cell development. This is supported by the inverse relationship between circulating IL-7 levels and peripheral CD4 T-cell numbers consistently found in lymphopenic states, including human immunodeficiency virus (HIV) infection [5, 6]. Nonhuman primate studies showed that IL-7 administration was safe and had a significant impact on T-cell homeostasis [7–10], including T-cell trafficking and proliferation in the gut mucosa [11]. In humans, phase I HIV and cancer studies demonstrated the safety and biologic activity of single or repeated doses of nonglycosylated recombinant human IL-7 (rhIL-7) [12–15]. With a favorable safety profile, rhIL-7 was shown to increase circulating numbers of both naive and memory CD4 and CD8 T cells. However, the most well-tolerated biologically active dose of rhIL-7 that could be applied in phase IIb/III studies still remains unclear [16, 17]

We report a phase I/IIa dose escalation study of repeated administration of a glycosylated rhIL-7 in HIV-1-infected patients whose CD4 T-cell counts failed to normalize despite virologic suppression with antiretroviral (ARV) therapy. The study objectives were to identify an optimal dosing regimen for phase IIb/III studies in HIV disease based on toxicity and efficacy and to further evaluate mechanisms of T-cell restoration with rhIL-7 therapy.

## SUBJECTS AND METHODS

### Subjects

Eligible subjects were chronically HIV-1-infected patients with CD4 T-cell counts of 101–400 cells/ $\mu$ L and plasma HIV RNA levels <50 copies/mL for  $\geq$ 6 months while receiving ARV therapy for  $\geq$ 12 months. Acceptable ARVs included any protease inhibitor (with or without ritonavir) or any non-nucleoside reverse-transcriptase inhibitor combined with 2 nucleoside reverse-transcriptase inhibitors.

### Recombinant Human IL-7

CYT107 is purified glycosylated 152 amino acid rhIL-7 expressed in a Chinese hamster ovary (CHO) cell line.

### Study Design and End Points

A randomized, placebo-controlled, single-blind, interpatient, dose escalation design was chosen to facilitate the replacement of subjects as needed and also because injection site reactions would unblind study staff. The study was approved by ethics committees or institutional review boards of all participating institutions in France, Italy, United States, and Canada and was registered in the EudraCT database (<http://eudract.emea.eu/>; protocol 2006–00624–20A) and at clinicaltrials.gov (NCT0047732), IND 100538, and CTA 9427-C2666/1-21C. All participants signed written informed consent before enrollment.

The subjects received 3 weekly subcutaneous (SC) injections of rhIL-7 on days 0, 7, and 14. Three different doses of CYT107—10, 20, and 30  $\mu$ g/kg—were tested sequentially. Ten patients (8 receiving rhIL-7, 2 receiving placebo (sodium chloride)) were randomized in each dose group and were seen on days 0, 7, 14, 21, 28, and 35, weeks 9 and 12, and then quarterly until week 52. The primary end point was safety, which was assessed through the reporting of adverse events using the Division of AIDS (December 2004) toxicity grading scale. Dose-limiting toxicity was defined as any grade 3 or 4 adverse event, a rash of grade  $\geq$ 2, or an immune restoration inflammatory syndrome event; a confirmed increase in plasma HIV RNA levels to  $>0.75$  log<sub>10</sub> copies/mL on day 28 or 35; detection of plasma IL-7 neutralizing antibodies at dilutions  $\geq$ 1:400; any diagnosis of lymphoma; or adenopathy compromising or threatening organ function. Secondary end points included changes from baseline in CD4 and CD8 T-cell counts (the baseline was defined as the mean of 4 values, including 2 obtained in the 6 months prior to study entry, the initial screening value, and the day 0 value).

### Immunophenotyping

Flow cytometric analyses were performed on cryopreserved peripheral blood mononuclear cells (PBMCs). Labeled cells were acquired with an LSRII cytometer and analyzed using DiVa software (Version 6.0). Nine T-cell subsets (Supplementary Table 1) and phenotypes were defined using the following antibodies: CD3-AmCyan, CD4-PB, CD8-PerCP-Cy5.5, CD45RA-ECD, CD27-APC-Alexa-750, CCR7-PE-Cy7, CD31-FITC, CD127-Alexa-647, PD-1-PE, Bcl2-FITC, HLA-DR-Alexa-700, CD38-FITC, Foxp3-Alexa700, and Ki-67-FITC.

### T-Cell Receptor Excision Circle Quantifications

Parallel quantification of sj T-cell receptor excision circles (TRECs) and each of the 13 DJ $\beta$  TRECs, together with the CD3 $\gamma$  gene (used as a housekeeping gene), was performed using LightCycler technology (Roche Diagnostics), as described elsewhere [18]. The sj/ $\beta$  TREC ratio was calculated as described elsewhere (sj/ $\beta$  TREC = sj TREC/ $10^5$  cells)/(DJ $\beta$ 1 TRECs/ $10^5$  cells + DJ $\beta$ 2 TRECs/ $10^5$  cells).

### Repertoire Diversity

The T-cell receptor (TCR) repertoire was measured using the ImmunTraCker test (ImmunID Technologies) and diversity (Divpenia and NDL score) was analyzed using Constel'ID software (ImmunID). Briefly,  $5 \times 10^6$  PBMCs were thawed and resuspended in EasyID buffer containing proteinase K. Multiplex polymerase chain reaction (PCR) analysis was performed on the genomic DNA, as described elsewhere [19, 20].

### HIV DNA Quantification

HIV-1 DNA was quantified in whole blood obtained at day 0, day 28, and week 12 using a real-time PCR method [21].

Results were converted into copies per 10<sup>6</sup> CD4 T lymphocytes using lymphocyte, monocyte, and CD4 T-cell counts, according to the following formula: [HIV DNA (copies/10<sup>6</sup> CD4 T cells) = HIV DNA (copies/10<sup>6</sup> PBMCs) × (PBMCs/μL)/CD4 T cells/μL]. HIV DNA levels were also calculated in copies per mL of whole blood: [HIV DNA (copies/mL whole blood) = (HIV DNA (copies/10<sup>6</sup> PBMCs) × (lymphocytes/μL + monocytes/μL)/1000].

### Statistical Analysis

All patients who received ≥1 injection were included in safety analyses. Immunologic activity was evaluated in patients who received all 3 weekly administrations. Changes in CD4 T-cell counts were calculated as absolute values, whereas changes in marker expression were reported as fold changes from baseline using the Wilcoxon test for paired samples. Statistical analysis was performed with SAS software, version 9.2 (SAS Institute).

## RESULTS

### Study Design and Subjects

Forty-seven subjects were screened, and 32 were enrolled (10, 12, and 10 in the 10, 20, or 30 μg/kg groups, respectively) (Supplementary Figure 1). The baseline characteristics are listed in Table 1. Overall, 6 patients received placebo (2 in each dose group). At 10 μg/kg, 7 subjects received 3 injections each, and 1 subject received a single injection. At 20 μg/kg, 8 of 10 subjects received 3 injections, and 2 discontinued treatment after 1 or 2 injections (the first because the total dose was given in a single administration and the second

because of a dispensing error). At 30 μg/kg, 6 of 8 subjects received 3 injections, and 2 received 1 injection because of a dose-limited toxic event after the first injection. All subjects completed the study follow-up.

### rhIL-7 Induction of Dose-Dependent Sustained Increase in T Lymphocytes

The subjects in the 10, 20, and 30 μg/kg and placebo groups had baseline CD4 T-cell counts of 268, 240, 276, and 280 cells/μL, respectively. At week 12, CD4 T cells were 419, 563, 799, and 259 cells/μL (*P* < .002 representing changes from baseline for each dose group compared with placebo) (Figure 1A). Increases were dose dependent (+188, +323, and +551 cells/μL, respectively). CD8 T-cell counts were 761, 659, 415, and 502 cells/μL at baseline in the 10, 20, and 30 μg/kg and placebo groups and at week 12, increased to 1081, 1210, 1011, and 487 cells/μL, respectively (Figure 1B) (*P* < .002 representing changes from baseline for each dose group, compared with placebo). At week 52, CD4 T-cell counts remained significantly higher than baseline in all rhIL-7 dose groups (change, +154, +172 and +209 cells/μL, respectively; all *P* < .005). CD8 T-cell counts also remained significantly higher in rhIL-7-treated subjects compared with baseline (*P* < .01).

A biologically active dose was defined as one that induced a CD4 T-cell increase of ≥50% above baseline at week 12 in 6 of 8 treated subjects. Both the 20 and 30 μg/kg doses were biologically active. The median time to reach a threshold of CD4 T-cell count of 500 cells/μL at all doses of rhIL-7 was 14 days; and at week 12, 62.5% (5 of 8 subjects) and 100% (6 of 6 subjects) in the 20 and 30 μg/kg groups maintained a CD4 T-cell count >500 cells/μL (data not shown).

**Table 1. Baseline Participant Characteristics by Dose Group**

| Characteristic                                                       | rhIL-7 Treatment |                   |                  |                  |
|----------------------------------------------------------------------|------------------|-------------------|------------------|------------------|
|                                                                      | 10 μg/kg (n = 8) | 20 μg/kg (n = 10) | 30 μg/kg (n = 8) | Placebo (n = 6)  |
| Age, years                                                           | 43 (27–66)       | 42 (35–52)        | 49 (41–52)       | 53 (48–59)       |
| Male-female ratio                                                    | 5:3              | 9:1               | 8:0              | 3:3              |
| Time since HIV diagnosis, years <sup>a</sup>                         | 5 (2–22)         | 5 (2–8)           | 21 (19–23)       | 14 (3–24)        |
| Duration of ARV, years <sup>a</sup>                                  | 4 (1–16)         | 1 (1–3)           | 6 (1–15)         | 9 (3–17)         |
| T-cell counts, cells/μL                                              |                  |                   |                  |                  |
| CD4 <sup>b</sup>                                                     | 268 (152–373)    | 240 (197–323)     | 276 (207–370)    | 280 (203–344)    |
| CD8 <sup>c</sup>                                                     | 761 (530–857)    | 659 (376–1090)    | 415 (209–1524)   | 502 (393–1123)   |
| Nadir CD4                                                            | 100 (10–278)     | 98 (8–206)        | 128 (8–254)      | 45 (5–210)       |
| CD4/CD8 ratio                                                        | 0.35 (0.18–0.62) | 0.39 (0.18–0.64)  | 0.5 (0.19–1.45)  | 0.50 (0.17–0.80) |
| Proviral HIV DNA, log <sub>10</sub> copies/10 <sup>6</sup> CD4 cells | 3.65 (2.79–4.20) | 4.04 (3.27–4.41)  | 3.13 (1.69–4.33) | 3.37 (3.05–3.50) |

Except for the sex ratios, all values represent medians (ranges). There were no significant differences between groups in any of the listed variables. All subjects had plasma HIV RNA levels <50 copies/mL.

Abbreviations: ARV, antiretroviral; HIV, human immunodeficiency virus; rhIL-7, recombinant human interleukin 7.

<sup>a</sup> Derived data.

<sup>b</sup> The baseline CD4 T-cell count was defined as the mean of 4 values, 2 in the 6 months prior to study entry, 1 at screening, and 1 at day 0.

<sup>c</sup> The baseline CD8 T-cell count was defined as the mean of results at screening and at day 0.

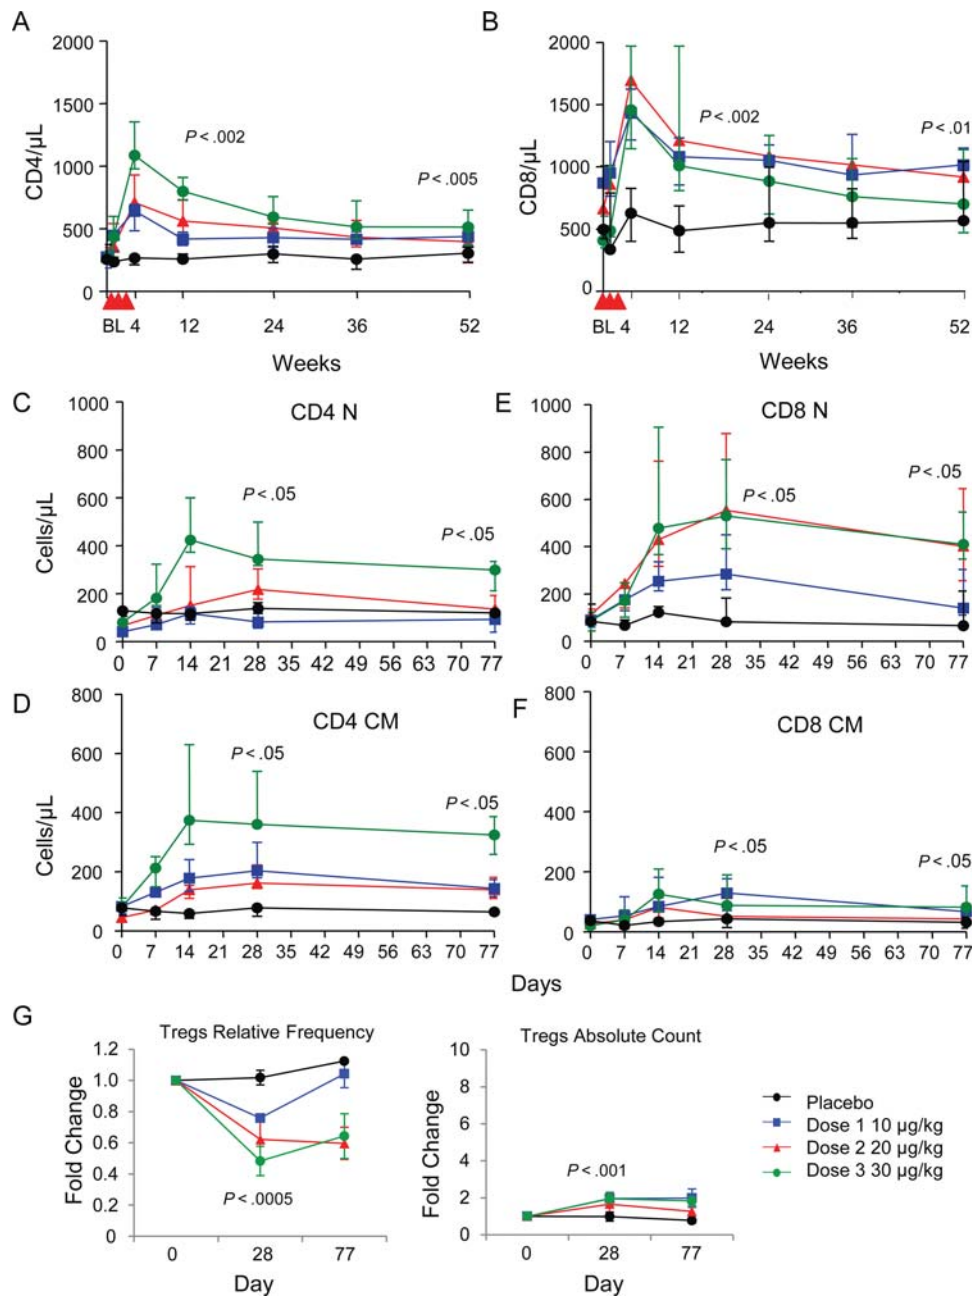

**Figure 1.** Changes in T-cell counts after recombinant human interleukin 7 (rhIL-7) administration. *A, B*, CD4 (*A*) and CD8 (*B*) T-cell counts (median, Quarter 1–Quarter 3) increased significantly at week 12 (day 77) after a rhIL-7 cycle (1 injection weekly for 3 weeks) ( $P < .002$ , representing changes from baseline for each dose group compared with placebo). The increase was dose-dependent for both CD4 and CD8 T cells and remained significant at week 52 ( $P < .005$  and  $P < .01$  for CD4 and CD8, respectively). *C–F*, Naive and central memory CD4 and CD8 T-cell subsets increased after rhIL-7 administration ( $P < .05$  represents comparisons between the 20 and 30 µg/kg dose groups and placebo group by Wilcoxon rank sum test). *G*, Administration of rhIL-7 increased absolute counts of regulatory T cells (Tregs), but their frequency was significantly decreased. Abbreviations: CM, central memory; N, naive.

### Effects of rhIL-7 Administration on CD4 and CD8 T-Cell Populations

We next investigated the phenotype of the rhIL-7-expanded T cells. We found a dose-dependent effect of rhIL-7 on both naive and central memory CD4 T cells at day 28 that remained

significantly different from baseline at week 12 (day 77) in groups treated with the 2 highest doses ( $P < .05$ ) (Figure 1*C* and 1*D*). Less-pronounced effects were seen for effector memory and terminal effector memory cells (data not shown). IL-7 effects were substantially more pronounced on naive than on memory



CD8 T-cell subsets (Figure 1E and 1F), reaching statistical significance in both subsets on days 28 and 77 ( $P < .05$ ) (week 12).

Recent results of interleukin 2 (IL-2)-based therapy trials in HIV-infected patients have raised concerns that the phenotypes of expanded CD4 cells [22] and regulatory T cells (Tregs) have similar features [23, 24]. In the current study, CD4 expansion also transiently increased the absolute numbers of Tregs (CD4<sup>+</sup>CD25<sup>+</sup>CD127<sup>-</sup>FoxP3<sup>+</sup>) in all treated groups on day 28 ( $P < .001$ ) (Figure 1G). However, the relative frequency of Tregs decreased significantly in the rhIL-7-treated subjects at day 28 ( $P = .0005$  compared with placebo) (Figure 1G), as other CD4 subsets had greater expansions.

### Effects of rhIL-7 Administration on Markers of T-Cell Homeostasis

Compared with the placebo group, all doses of rhIL-7 increased the frequency of Ki-67 expression among naive, central memory, and effector memory CD4 T cells (pooled groups, all  $P < .001$  at day 7) (Figure 2A). This effect peaked on day 7, after 1 dose of rhIL-7 in each group. A similar effect of rhIL-7 was noted among CD8 T-cell subsets (Figure 2A). This effect was not dose dependent, and the frequency of cycling T cells returned to baseline on day 28 in all groups (Figure 2A). As shown elsewhere in cancer patients [15], a significant transient increase in CD4 and CD8 T cells expressing Bcl-2 was observed during rhIL-7 therapy (at days 7 and 14 for pooled rhIL-7 groups,  $P < .001$ ); these counts subsequently returned to values lower than baseline ( $P < .001$  at week 12 [day 77]) (Supplementary Figure 2).

### Effects of rhIL-7 on T-Cell Expression of Programmed-Death 1

The proportion of T cells expressing Programmed-Death 1 (PD-1), a marker of activation or exhaustion in HIV-infected subjects [25], was also evaluated. As shown in Figure 2B, the frequency of CD4<sup>+</sup>PD-1<sup>+</sup> and CD8<sup>+</sup>PD-1<sup>+</sup> T cells decreased significantly from baseline (up to a 40% decrease for subjects treated with 20 or 30  $\mu\text{g}/\text{kg}$  rhIL-7;  $P < .05$ ) for both CD4 and CD8 and memory T cells at days 28 and 77. Administration of rhIL-7 did not significantly change the frequency of CD4 and CD8 T cells coexpressing the activation marker CD38<sup>+</sup>/DR<sup>+</sup> (Supplementary Figure 3).

### Effects of rhIL-7 on Thymocyte Proliferation and the T-Cell Repertoire

We next quantified the proportion of recent thymic emigrants (RTE) among naive CD4 T cells, cells containing T-cell receptor excision circles (TRECs), and TCR diversity using a quantitative real-time PCR method. As shown in Figure 3A, for subjects treated with the highest doses (20 or 30  $\mu\text{g}/\text{kg}$ ), rhIL-7 increased both naive and RTE CD4 T cells at day 77 ( $P < .05$

for both subsets as compared with baseline). We also found an increase in the sj/ $\beta$  TREC ratio (a reflection of thymic output [18]) from 46 at day 0 to 68.7 at week 12 (day 77), (mean fold increase, 1.8;  $P = .06$ ). There was a significant inverse relationship between the change in sj/ $\beta$  TREC ratio and the CD4 T-cell count at day 0 and the nadir ( $r = 0.40$ ;  $P = .01$ ; Spearman's test) (Figure 3B).

When compared with the T-cell repertoire diversity of historical controls, the repertoire diversity of patients varied from 36% to 83% (median, 63%) at baseline (Figure 3C). Diversity scores did not increase significantly at day 28 (71.5%) or week 12 (64.3%) (Figure 3C). Subjects with normal TCR diversity at baseline remained in stable condition. Four subjects with a low baseline diversity score who received rhIL-7 exhibited increased TCR diversity, from 49%, 55%, 36%, and 50% at entry to 75%, 61%, and 59% (two patients) at day 28 (Figure 3C), and this change persisted at week 12 (67%, 70%, 52%, and 61%); changes were not noted in a fifth subject who received placebo. A detailed analysis of the clonotypes from 1 rhIL-7 and 1 placebo recipient is shown in Figure 3D.

### Effects of rhIL-7 Administration on HIV Replication

No changes in plasma HIV RNA levels were noted in subjects in the placebo and 10  $\mu\text{g}/\text{kg}$  groups. In contrast, 4 and 2 subjects in the 20 and 30  $\mu\text{g}/\text{kg}$  dose groups, respectively, experienced transient increases of plasma HIV RNA during or immediately after rhIL-7 administration (<400 copies/mL in 5 and 1023 copies/mL in the sixth). No modifications of highly active ARV therapy or compliance issues were recognized in these subjects. All subsequent plasma HIV RNA levels remained below detection through week 52, except in 2 subjects (85 and 52 copies/mL).

Table 2 shows the evolution of the total amount of cell-associated DNA from HIV. There were no significant changes in intracellular HIV-1 DNA levels when these levels were expressed per  $10^6$  PBMC or  $10^6$  CD4 T cells, irrespective of the treatment group at week 12 (Table 2). In contrast, when expressed as  $\log_{10}$  copies per milliliter of blood, HIV-1 DNA significantly increased in subjects treated with 20  $\mu\text{g}/\text{kg}$  (median change, 0.4  $\log_{10}$  copies/mL,  $P = .03$  compared with day 0) or 30  $\mu\text{g}/\text{kg}$  (median change, 0.5  $\log_{10}$  copies/mL;  $P = .006$  compared with day 0).

### Safety, Tolerability, and Pharmacokinetics of rhIL-7

At 10 or 20  $\mu\text{g}/\text{kg}$ , rhIL-7 was well tolerated. At 30  $\mu\text{g}/\text{kg}$ , dose-limiting toxicity was observed in 2 subjects, one with a transient grade 3 alanine aminotransferase increase and the other with a grade 2 rash. No neutralizing anti-IL-7 antibodies were detected. The pharmacokinetic analysis showed loss of the linear relationship between the area under the curve and dose at 30  $\mu\text{g}/\text{kg}$  (Supplementary Figure 4).

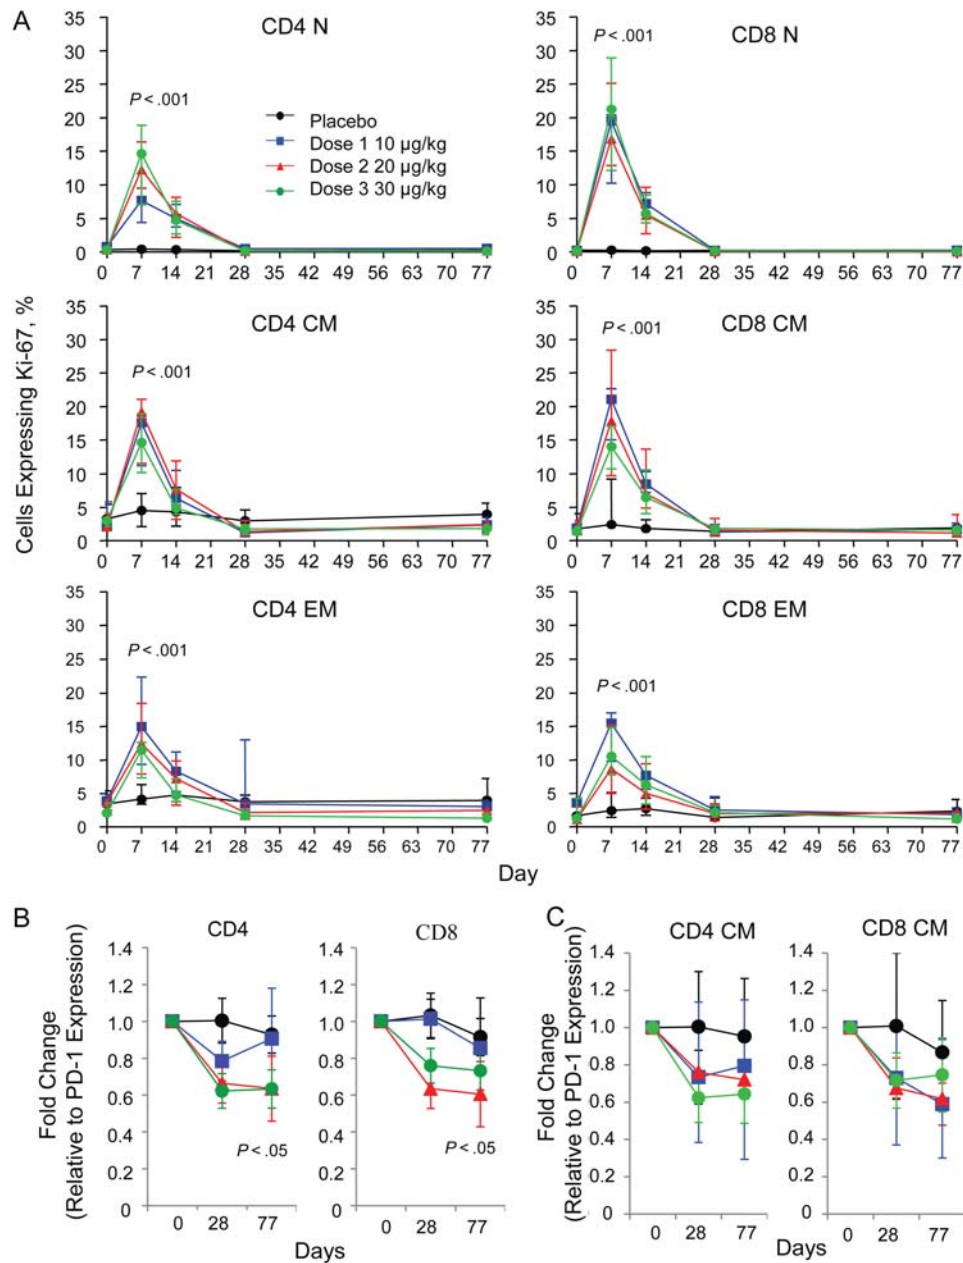

**Figure 2.** Cycling of CD4 and CD8 T-cell subsets in response to recombinant human interleukin 7 (rhIL-7). *A*, Flow cytometry was used to determine Ki-67 expression in T-cell subsets. Increased naive, central memory (CM), and effector memory T-cell cycling was seen on day 7 (pooled rhIL-7 groups compared with placebo,  $P < .001$ ), returning to baseline by day 28 (median, Quarter 1–Quarter 3). The increase was not dose dependent and occurred in both CD4 and CD8 subsets. *B*, PD-1 expression decreased on both CD4 and CD8 T cells 28 days after 20 and 30 µg/kg rhIL-7 administration ( $P < .05$  for each). The decrease persisted until day 77 ( $P < .05$ ). *C*, CM subsets showed decreased expression of PD-1. Abbreviations: CM, central memory; EM, effector memory; N, naive.

## DISCUSSION

This study was designed to identify a well-tolerated dose of rhIL-7 that would achieve the main desirable biologic effect of IL-7, namely, expansion of the CD4 T-cell pool in HIV-1-infected subjects. We show substantial and sustained CD4 T-cell expansions for as long as 1 year after IL-7 treatment, decreases

in the proportions of PD-1<sup>+</sup> T cells, and improved thymopoiesis with broadening of the T-cell repertoire in a few subjects.

IL-7 consistently increases circulating T cells in HIV-1-infected patients, as was shown with previous formulations [12] and different schedules of administration [26]. The new formulation of rhIL-7 (CYT107) given as a cycle of 3 weekly injections led to a safe and significant increase in circulating

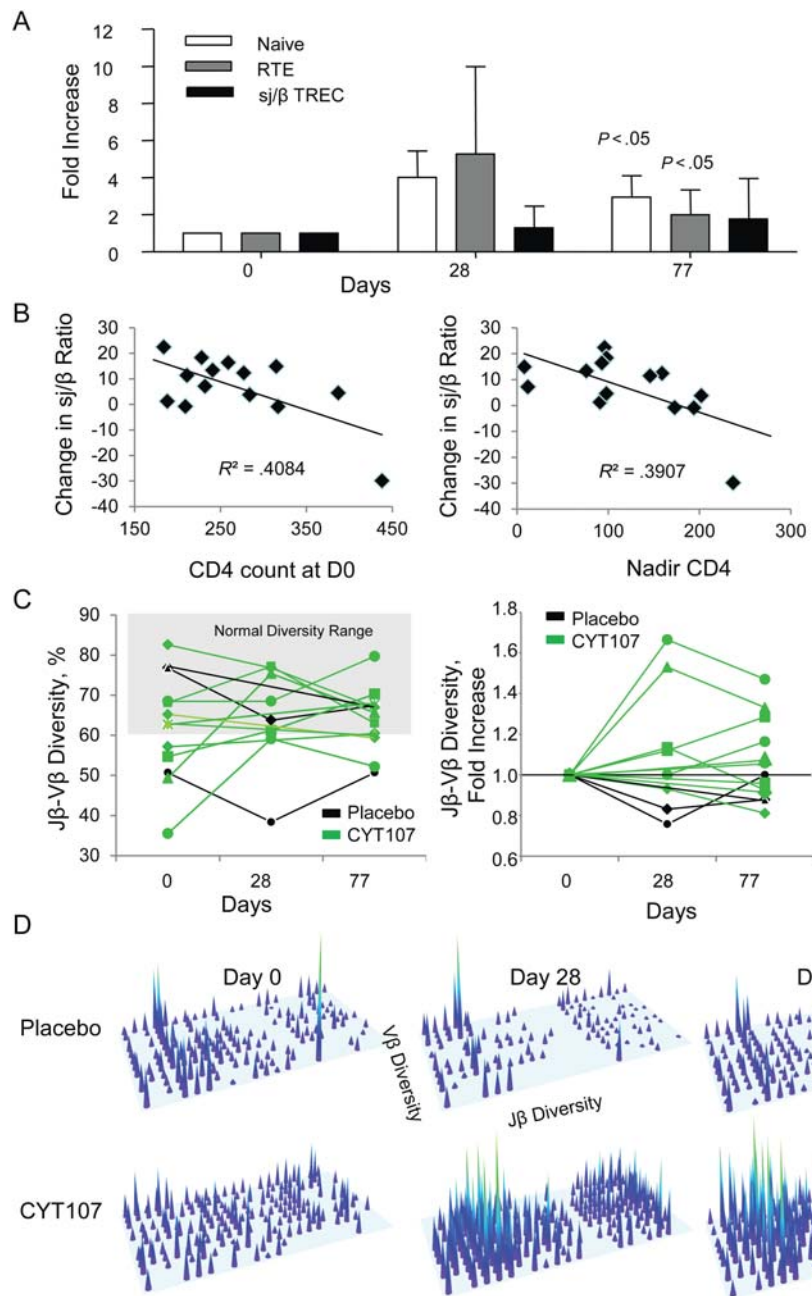

**Figure 3.** Recombinant human interleukin 7 (rhIL-7) therapy increases numbers of naive and recent thymic emigrants (RTE) CD4 T cells and broadens the T-cell receptor (TCR) repertoire in a few subjects. Data shown are for subjects who received 3 doses of rhIL-7 at 20 or 30  $\mu\text{g}/\text{kg}$ . **A**, Thymic activity was evaluated using the sj/β T-cell receptor excision circles (TREC) ratio. Treatment with rhIL-7 increased the number of naive and RTE cells in the peripheral blood on day 77 ( $P < .05$ , 20 and 30  $\mu\text{g}/\text{kg}$  pooled data). The sj/β TREC ratio tended to increase ( $P = .06$ , pooled data for 20 and 30  $\mu\text{g}/\text{kg}$ ). **B**, The CD4 T-cell count at day 0 and CD4 nadir were associated with a change in the sj/β TREC ratio between days 0 and 77 ( $P = .01$ ; Spearman's test). **C**, Subjects with lower CD4 T-cell counts experienced greater increases in thymopoiesis after rhIL-7 treatment. TCR repertoire diversity was assessed by quantifying all possible combinations between Vβ and Jβ segments. Shaded area represents range of diversity in historical controls. Diversity increased in all rhIL-7-treated subjects with diversity below the normal range but not significantly for the treated groups overall. **D**, Distribution of peaks for each Vβ-Jβ rearrangement for a placebo-treated and a rhIL-7-treated patient. Abbreviations: RTE, recent thymic emigrant; TREC, T-cell receptor excision circle.

CD4 T cells. In addition, based on tolerance and biologic activity, we identified the 20  $\mu\text{g}/\text{kg}$  dose as ideal for future studies.

HIV infection is characterized by a progressive depletion of CD4 T cells due to direct killing, decreased survival of activated cells, and an impairment of thymic production and naive

**Table 2. Changes in Total Cell-Associated HIV DNA Levels**

| Dose Group              | Change in HIV DNA Level From Baseline, Median (IQR) |                  |                            |                             |                      |                            |                               |                            |                  |                      |                            |  |  |  |  |
|-------------------------|-----------------------------------------------------|------------------|----------------------------|-----------------------------|----------------------|----------------------------|-------------------------------|----------------------------|------------------|----------------------|----------------------------|--|--|--|--|
|                         | Day 0                                               |                  |                            |                             |                      | Day 28                     |                               |                            |                  |                      | Week 12                    |  |  |  |  |
|                         | Copies/ $10^6$ PBMCs                                | Copies/ $\mu$ L  | Copies/ $10^6$ CD4 T Cells | Log <sub>10</sub> Copies/mL | Copies/ $10^6$ PBMCs | Copies/ $10^6$ CD4 T Cells | Copies/ $10^6$ PBMCs          | Copies/ $10^6$ CD4 T Cells | Copies/ $\mu$ L  | Copies/ $10^6$ PBMCs | Copies/ $10^6$ CD4 T Cells |  |  |  |  |
| Placebo (n = 6)         | 2.75 (2.62–2.98)                                    | 2.47 (2.32–2.70) | 3.37 (3.33–3.41)           | 3.02 (2.78–3.07)            | 2.67 (2.68–2.79)     | 3.49 (3.38–3.54)           | 2.77 (2.63–2.94)              | 2.51 (2.31–2.75)           | 3.35 (3.09–3.58) |                      |                            |  |  |  |  |
| rhIL-7 dose, $\mu$ g/kg |                                                     |                  |                            |                             |                      |                            |                               |                            |                  |                      |                            |  |  |  |  |
| 10 (n = 7)              | 2.89 (2.72–3.52)                                    | 2.63 (2.34–3.27) | 3.65 (3.16–4.15)           | 3.33 (3.00–3.64)            | 2.90 (2.50–3.15)     | 3.57 (3.05–3.94)           | 3.36 (2.89–3.48)              | 3.00 (2.44–3.19)           | 3.79 (3.04–3.92) |                      |                            |  |  |  |  |
| 20 (n = 8)              | 3.52 (3.00–3.70)                                    | 3.24 (2.87–3.36) | 4.04 (3.59–4.22)           | 3.84 (3.57–4.13)            | 3.38 (3.00–3.58)     | 4.06 (3.77–4.15)           | 3.63 <sup>a</sup> (3.23–3.87) | 3.35 (2.87–3.40)           | 3.90 (3.62–4.10) |                      |                            |  |  |  |  |
| 30 (n = 6)              | 2.47 (2.03–3.45)                                    | 2.29 (1.99–2.94) | 3.13 (2.62–4.03)           | 3.15 (2.70–3.79)            | 2.57 (2.18–3.15)     | 3.16 (2.56–3.80)           | 2.98 <sup>a</sup> (2.64–3.69) | 2.49 (2.29–3.15)           | 3.12 (2.68–3.92) |                      |                            |  |  |  |  |

Abbreviations: HIV, human immunodeficiency virus; IQR, interquartile range; PBMCs, peripheral blood mononuclear cells; rhIL-7, recombinant human interleukin 7.  
<sup>a</sup> Increased significantly ( $P < .05$ ) compared with day 0 (baseline).

T-cell expansion capacity [27]. We show that rhIL-7 increases predominantly the naive and central memory CD4 and CD8 T-cell subsets. Cellular proliferation, as indicated by Ki-67 staining, is probably a major mechanism. Although difficult to measure in vivo, improved T-cell survival due to rhIL-7 could not be ruled out. Such an effect was suggested by the decreased expression of the exhaustion markers (PD-1) on T cells and transient increases in Bcl-2 expression, as shown in the current study and elsewhere in cancer patients [15].

A novel aspect of the present study was the characterization of the naive T-cell compartment through phenotypic and molecular measurements. Our findings of an increase in RTE and sj/ $\beta$  TREC were compatible with an effect of rhIL-7 on thymic output and the production and/or expansion of a younger cell population (eg, naive T cells). We also found changes in the TCR repertoire in a few subjects with the lowest TCR diversity at entry. These observations require validation in additional patients and with a long-term follow-up. Although in the current study we cannot relate these phenotypic and molecular changes to a restoration of T-cell function, an earlier study by our group has shown that IL-7-expanded CD4 T cells respond well in vitro to mitogens, recall antigens, and HIV peptides [22]. Similar observations have been made among patients with cancer who received rhIL-7 [15].

Recent experience with IL-2 therapy in HIV-infected patients shows that an increase in CD4 T cells does not necessarily confer a clinical benefit. Analyses of IL-2-expanded cells have shown a predominant expansion of CD25 T cells [28] with a long half-life [29] that share molecular and functional characteristics of Tregs [24]. In contrast, we find that most expanded CD4 T cells in rhIL-7-treated subjects did not exhibit Treg features, resulting in a relative decrease in Tregs within the total CD4 T-cell population. Other important differences between IL-2 and IL-7 are the concomitant expansion of CD8 T cells, the improved safety profile, and the pharmacokinetic characteristics of rhIL-7 that could make weekly injections feasible [24].

To date, the long-term effects and safety of rhIL-7 are unknown. In previous studies of rhIL-7, transient elevations in plasma HIV RNA levels were noted. A recent study suggested that the population of cells that harbor HIV DNA may be targeted and expanded by IL-7 [30]. In the present study, about 1 in 4 subjects experienced a transient increase in plasma HIV RNA levels, and though there was no increase in the proportion of cells containing HIV DNA, the concentration of HIV DNA per milliliter of blood increased. Although statistically significant, the clinical relevance of this observation remains to be determined and will be evaluated in future studies.

From a clinical perspective, rhIL-7 may prove to be an attractive therapeutic adjuvant in HIV disease. If shown to be safe in longer-term studies, repeated administration of rhIL-7 may help patients reach and sustain normal circulating CD4 T-cell



counts. Several epidemiologic studies have indicated that the circulating CD4 T-cell count is an important predictor of morbidity including cardiovascular, malignant, renal and hepatic disease in HIV infection even in patients with controlled viremia receiving ARV therapy [31–33]. As noted above, recent experience indicates that the circulating CD4 T-cell count in the setting of cytokine-based therapy of HIV disease may not be a valid predictor of clinical benefit [22]. Therefore, to confirm clinical utility, clinical trials will need to focus on clinical end points to determine whether the promising biologic effects of IL-7 can be translated into clinical benefit.

## Supplementary Data

Supplementary materials are available at *Clinical Infectious Diseases* online (<http://cid.oxfordjournals.org>). Supplementary materials consist of data provided by the authors that are published to benefit the reader. The posted materials are not copyedited. The content of all supplementary data are the sole responsibility of the authors. Questions or messages regarding errors should be addressed to the author.

## Notes

**Acknowledgments.** The authors would like to thank all the study participants and also C. Orefice, C. Delgrande, C. Cox, C. Janot-Sardet, and S. Cacciaguerra for clinical, logistic and laboratory support; the investigative team from each participating center; C. Morgan and F. Aubin for statistical analysis; N. Pasqual and N. Plantier from ImmunId; and P. Tebas, J. Jacobson, and C. Bazin for serving as members of the Independent Safety Monitoring Committee.

**Disclaimer.** M. M. was the CEO and a shareholder of Cytheris SA. S. B. and T. C. are employees and shareholders of Cytheris SA.

**Financial support.** This work was supported by Cytheris SA, with the exception of the work of I. S., which was supported by the Intramural Research Program of the National Institute of Allergy and Infectious Diseases, National Institutes of Health.

**Author contributions.** Y. L., I. S. and M. M. L. designed the study, recruited and cared for participants, interpreted data, and prepared the manuscript. G. T., J. P. R., J. D. L., J. F. D., J. M. M., M. F., C. G. and B. R. participated in the study design, participant recruitment and care, data collection and interpretation, and manuscript preparation. C. R., V. A. F., J. F. P., R. P. S., and S. B. designed and executed experiments, collected, analyzed and interpreted data, and participated in manuscript preparation. R. T. analyzed and interpreted data, and assisted in manuscript preparation. M. M. S. B and T. C. assisted in the study design and execution, and manuscript preparation.

**Potential conflicts of interest.** All authors: No reported conflicts.

All authors have submitted the ICMJE Form for Disclosure of Potential Conflicts of Interest. Conflicts that the editors consider relevant to the content of the manuscript have been disclosed.

## References

- von Freeden-Jeffry U, Vieira P, Lucian LA, McNeil T, Burdach SE, Murray R. Lymphopenia in interleukin (IL)-7 gene-deleted mice identifies IL-7 as a nonredundant cytokine. *J Exp Med* **1995**; 181:1519–26.
- Beq S, Delfraissy JF, Theze J. Interleukin-7 (IL-7): immune function, involvement in the pathogenesis of HIV infection and therapeutic potential. *Euro Cytokine Netw* **2004**; 15:279–89.
- Puel A, Ziegler SF, Buckley RH, Leonard WJ. Defective IL7R expression in T<sup>B</sup>NK<sup>+</sup> severe combined immunodeficiency. *Nat Genet* **1998**; 20:394–7.
- Noguchi M, Nakamura Y, Russell SM, et al. Interleukin-2 receptor gamma chain: a functional component of the interleukin-7 receptor. *Science* **1993**; 262:1877–80.
- Bolotin E, Annett G, Parkman R, Weinberg K. Serum levels of IL-7 in bone marrow transplant recipients: relationship to clinical characteristics and lymphocyte count. *Bone Marrow Transplant* **1999**; 23:783–8.
- Napolitano LA, Grant RM, Deeks SG, et al. Increased production of IL-7 accompanies HIV-1-mediated T-cell depletion: implications for T-cell homeostasis. *Nat Med* **2001**; 7:73–9.
- Beq S, Nugeyre MT, Ho Tsong Fang R, et al. IL-7 induces immunological improvement in SIV-infected rhesus macaques under antiviral therapy. *J Immunol* **2006**; 176:914–22.
- Fry TJ, Moniuszko M, Creekmore S, et al. IL-7 therapy dramatically alters peripheral T-cell homeostasis in normal and SIV-infected non-human primates. *Blood* **2003**; 101:2294–9.
- Mackall CL, Fry TJ, Bare C, Morgan P, Galbraith A, Gress RE. IL-7 increases both thymic-dependent and thymic-independent T-cell regeneration after bone marrow transplantation. *Blood* **2001**; 97:1491–7.
- Storek J, Gillespy T 3rd, Lu H, et al. Interleukin-7 improves CD4 T-cell reconstitution after autologous CD34 cell transplantation in monkeys. *Blood* **2003**; 101:4209–18.
- Beq S, Rozlan S, Gautier D, et al. Injection of glycosylated recombinant simian IL-7 provokes rapid and massive T-cell homing in rhesus macaques. *Blood* **2009**; 114:816–25.
- Levy Y, Lacabaratz C, Weiss L, et al. Enhanced T cell recovery in HIV-1-infected adults through IL-7 treatment. *J Clin Invest* **2009**; 119:997–1007.
- Rosenberg SA, Sportes C, Ahmadzadeh M, et al. IL-7 administration to humans leads to expansion of CD8+ and CD4+ cells but a relative decrease of CD4+ T-regulatory cells. *J Immunother* **2006**; 29:313–9.
- Sereti I. Where have all the T cells gone? *Blood* **2009**; 114:751–2.
- Sportes C, Hakim FT, Memon SA, et al. Administration of rhIL-7 in humans increases in vivo TCR repertoire diversity by preferential expansion of naive T cell subsets. *J Exp Med* **2008**; 205:1701–14.
- Relieff JD, Levy Y. Perspectives on interleukin-7 therapy in HIV infection. *Curr Opin HIV AIDS* **2007**; 2:228–33.
- Mackall CL, Fry TJ, Gress RE. Harnessing the biology of IL-7 for therapeutic application. *Nat Rev Immunol* **2011**; 11:330–42.
- Dion ML, Sekaly RP, Cheynier R. Estimating thymic function through quantification of T-cell receptor excision circles. *Methods Mol Biol* **2007**; 380:197–213.
- Marodon G, Desjardins D, Mercey L, et al. High diversity of the immune repertoire in humanized NOD.SCID.gamma c-/- mice. *Eur J Immunol* **2009**; 39:2136–45.
- Pasqual N, Gallagher M, Aude-Garcia C, et al. Quantitative and qualitative changes in V-J alpha rearrangements during mouse thymocyte differentiation: implication for a limited T cell receptor alpha chain repertoire. *J Exp Med* **2002**; 196:1163–73.
- Avettand-Fenoel V, Chaix ML, Blanche S, et al. LTR real-time PCR for HIV-1 DNA quantitation in blood cells for early diagnosis in infants born to seropositive mothers treated in HAART area (ANRS CO 01). *J Med Virol* **2009**; 81:217–23.
- Abrams D, Levy Y, Losso MH, et al. Interleukin-2 therapy in patients with HIV infection. *N Engl J Med* **2009**; 361:1548–59.
- Sereti I, Imamichi H, Natarajan V, et al. In vivo expansion of CD4CD45RO-CD25 T cells expressing foxP3 in IL-2-treated HIV-infected patients. *J Clin Invest* **2005**; 115:1839–47.
- Weiss L, Letimier FA, Carriere M, et al. In vivo expansion of naive and activated CD4+CD25+FOXP3+ regulatory T cell populations in interleukin-2-treated HIV patients. *Proc Natl Acad Sci U S A* **2010**; 107:10632–7.
- Said EA, Dupuy FP, Trautmann L, et al. Programmed death-1-induced interleukin-10 production by monocytes impairs CD4+ T cell activation during HIV infection. *Nat Med* **2010**; 16:452–9.

26. Sereti I, Dunham RM, Spritzler J, et al. IL-7 administration drives T cell-cycle entry and expansion in HIV-1 infection. *Blood* **2009**; 113:6304–14.
27. Sieg SF, Harding CV, Lederman MM. HIV-1 infection impairs cell cycle progression of CD4<sup>+</sup> T cells without affecting early activation responses. *J Clin Invest* **2001**; 108:757–64.
28. Sereti I, Anthony KB, Martinez-Wilson H, et al. IL-2-induced CD4+ T-cell expansion in HIV-infected patients is associated with long-term decreases in T-cell proliferation. *Blood* **2004**; 104:775–80.
29. Kovacs JA, Lempicki RA, Sidorov IA, et al. Induction of prolonged survival of CD4+ T lymphocytes by intermittent IL-2 therapy in HIV-infected patients. *J Clin Invest* **2005**; 115:2139–48.
30. Chomont N, El-Far M, Ancuta P, et al. HIV reservoir size and persistence are driven by T cell survival and homeostatic proliferation. *Nat Med* **2009**; 15:893–900.
31. Bruyand M, Thiebaut R, Lawson-Ayayi S, et al. Role of uncontrolled HIV RNA level and immunodeficiency in the occurrence of malignancy in HIV-infected patients during the combination antiretroviral therapy era: Agence Nationale de Recherche sur le Sida (ANRS) CO3 Aquitaine Cohort. *Clin Infect Dis* **2009**; 49:1109–16.
32. Guiguet M, Boue F, Cadranel J, Lang JM, Rosenthal E, Costagliola D. Effect of immunodeficiency, HIV viral load, and antiretroviral therapy on the risk of individual malignancies (FHDH-ANRS CO4): a prospective cohort study. *Lancet Oncol* **2009**; 10:1152–9.
33. Lewden C, Chene G, Morlat P, et al. HIV-infected adults with a CD4 cell count greater than 500 cells/mm<sup>3</sup> on long-term combination antiretroviral therapy reach same mortality rates as the general population. *J Acquir Immune Defic Syndr* **2007**; 46: 72–7.
